# Supplementary material for: Rational design of an ortho-vinylhydropyridine-assisted amino-fluorophore as a hypochlorite fluorescent probe
Source: Royal Society of Chemistry journal article supplement (doi:10.1039/d2nj04481a), 2022-11-14
Supplement: d2nj04481a1.pdf [file d2nj04481a1.pdf]

## Supporting Information for

### Rational design of ortho-vinylhydropyridine-assisted amino-fluorophore as hypochlorite fluorescent probe

Zhihua Chen <sup>a</sup>, Yan Hu <sup>a</sup>, Lili Ma <sup>a</sup>, Ziyi Zhang <sup>a</sup>, Dandan Li <sup>b,\*</sup> and Chuanxiang Liu <sup>a,\*</sup>

<sup>a</sup> School of Chemical and Environmental Engineering, Shanghai Institute of Technology, Shanghai 201418, P. R. China. Tel: +86 21 60877220; E-mail: [cxliu@sit.edu.cn](mailto:cxliu@sit.edu.cn).

<sup>b</sup> Clinical Medical Research Center, The Second Clinical Medical College of Jinan University (Shenzhen People's Hospital), Shenzhen, Guangdong 518020, P. R. China. E-mail: [dandanli1508@163.com](mailto:dandanli1508@163.com)

**e-mail: [cxliu@sit.edu.cn](mailto:cxliu@sit.edu.cn);**

|                                                                                  |    |
|----------------------------------------------------------------------------------|----|
| 1. Solvent effect of probe 1a .....                                              | S1 |
| 2. Linear fluorescence response of sensor 1a to ClO <sup>-</sup> .....           | S1 |
| 3. LC-MS analysis of the probe 1a with NaClO .....                               | S2 |
| 4. NMR titration experiments of 1a with ClO <sup>-</sup> .....                   | S3 |
| 5. <sup>1</sup> H NMR spectra of compound 4b.....                                | S3 |
| 6. Comparison of UV-vis spectra of 4b with the final state of 1a with NaClO..... | S4 |
| 7. Solvent effect of compound 4b .....                                           | S4 |
| 8. The fluorescence titration of compound 4b with ClO <sup>-</sup> .....         | S4 |
| 9. Relative Cell Viability .....                                                 | S5 |
| 10. The application of probe 1a in test paper .....                              | S6 |
| 11. <sup>1</sup> H NMR spectra of the probe 1a .....                             | S6 |
| 12. Comparison of the this work with reported HClO probes .....                  | S7 |

## 1. Solvent effect of probe 1a

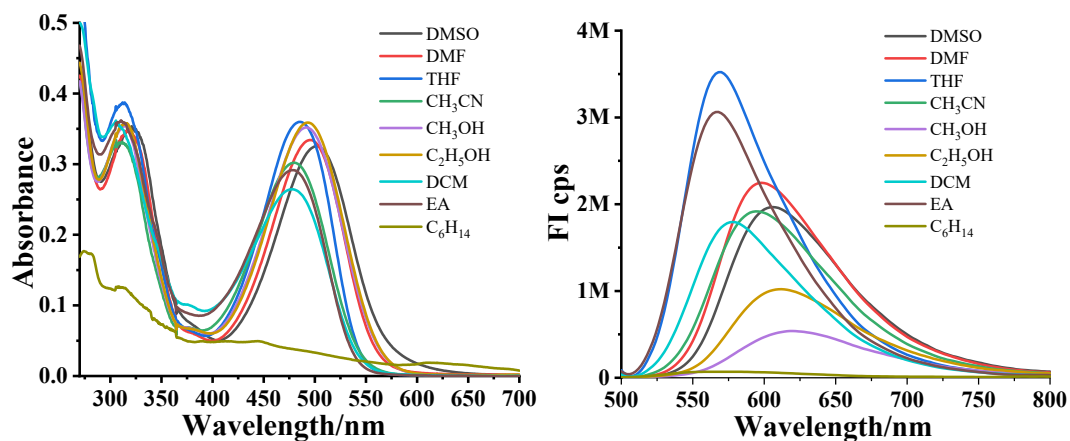

Figure S1 Absorption and emission spectral of probe 1a (20  $\mu\text{M}$ ) in different solvents.

## 2. Linear fluorescence response of sensor 1a to ClO<sup>-</sup>.

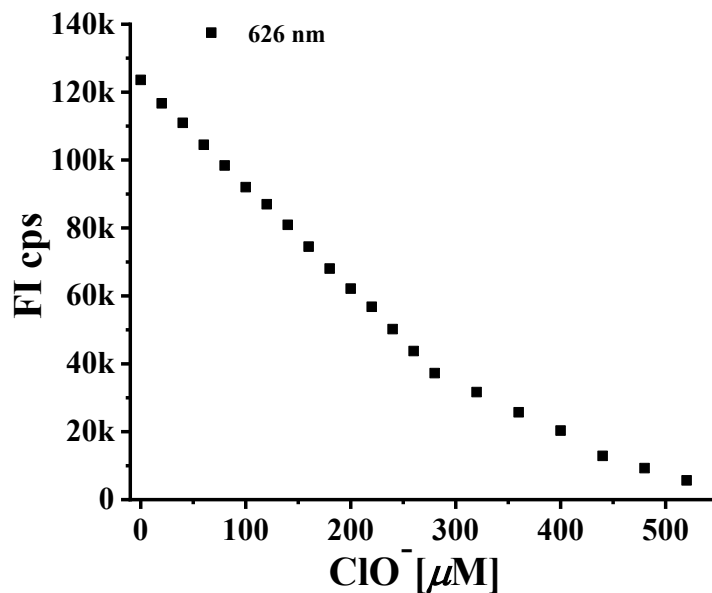

Figure S2 Fluorescence spectral changes of 1a (20  $\mu\text{M}$ ) ( $\lambda_{\text{ex}} = 480 \text{ nm}$ ) upon the titration with ClO<sup>-</sup> (0 to 25.0 equiv.) in PBS buffer (pH 7.4, with 10% CH<sub>3</sub>CN, v/v).

### 3. LC-MS analysis of the probe 1a with NaClO

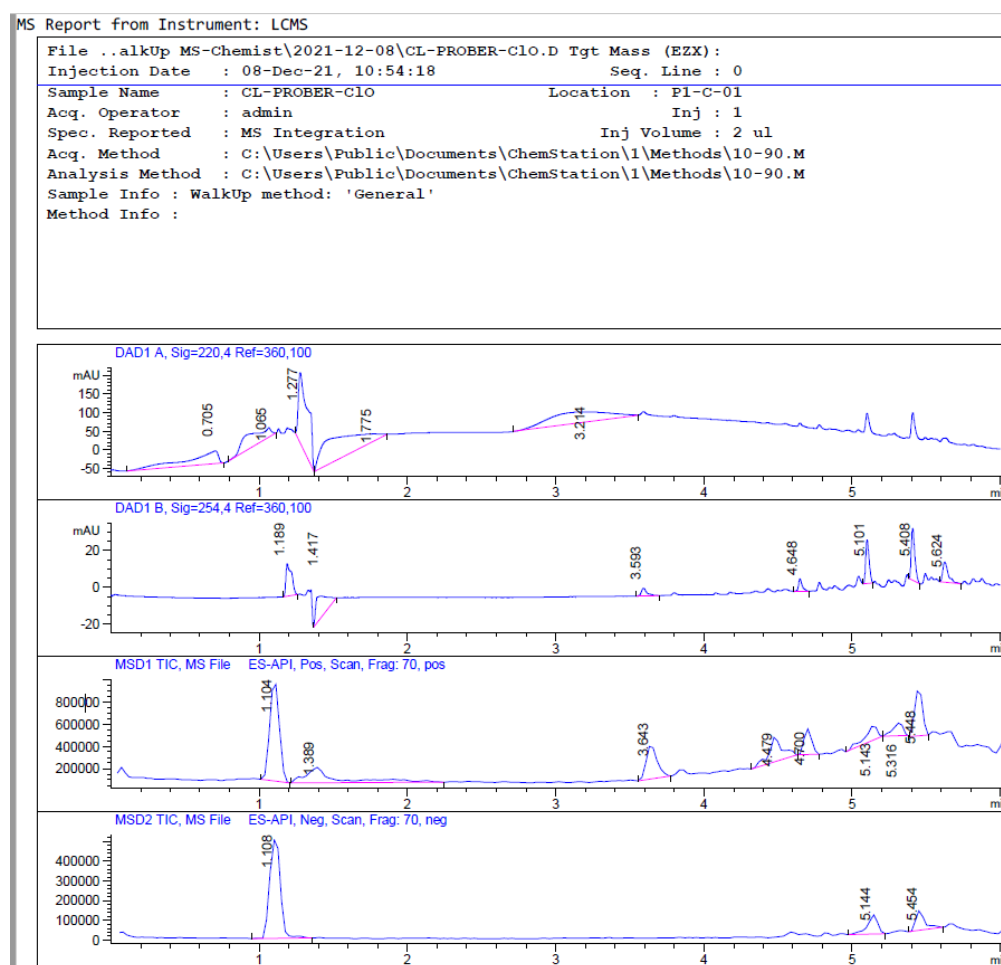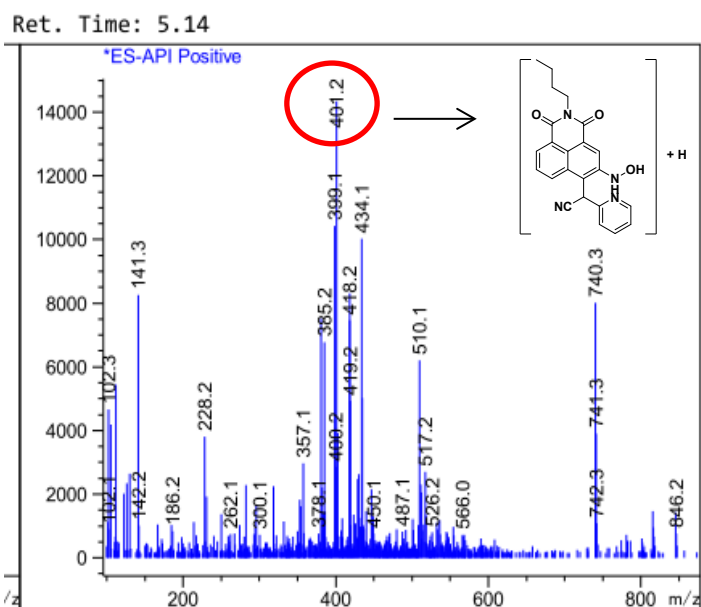

Figure S3 The LC-MS analysis of the probe 1a (20  $\mu$ M) with 25.0 equiv. NaClO in CH<sub>3</sub>CN

#### 4. NMR titration experiments of 1a with ClO<sup>-</sup>

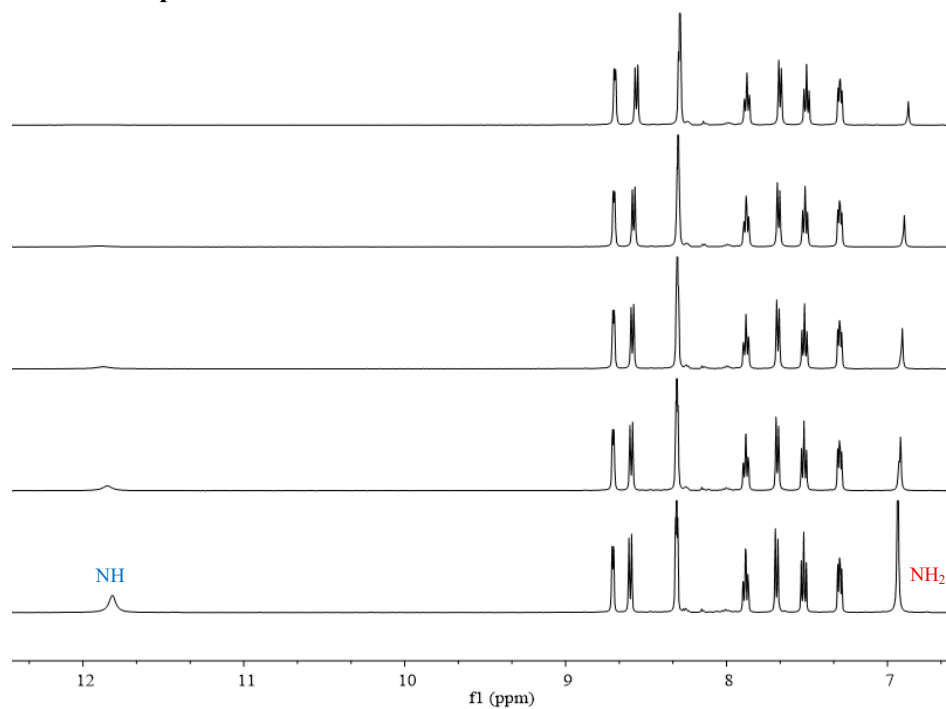

**Figure S4** The NMR titration of **1a** (30.0 mM) in DMSO-*d*<sub>6</sub> with increasing concentration of ClO<sup>-</sup> (from bottom to top, 0, 0.2, 0.4, 0.6 and 1.0 equiv.)

#### 5. <sup>1</sup>H NMR spectra of compound 4b.

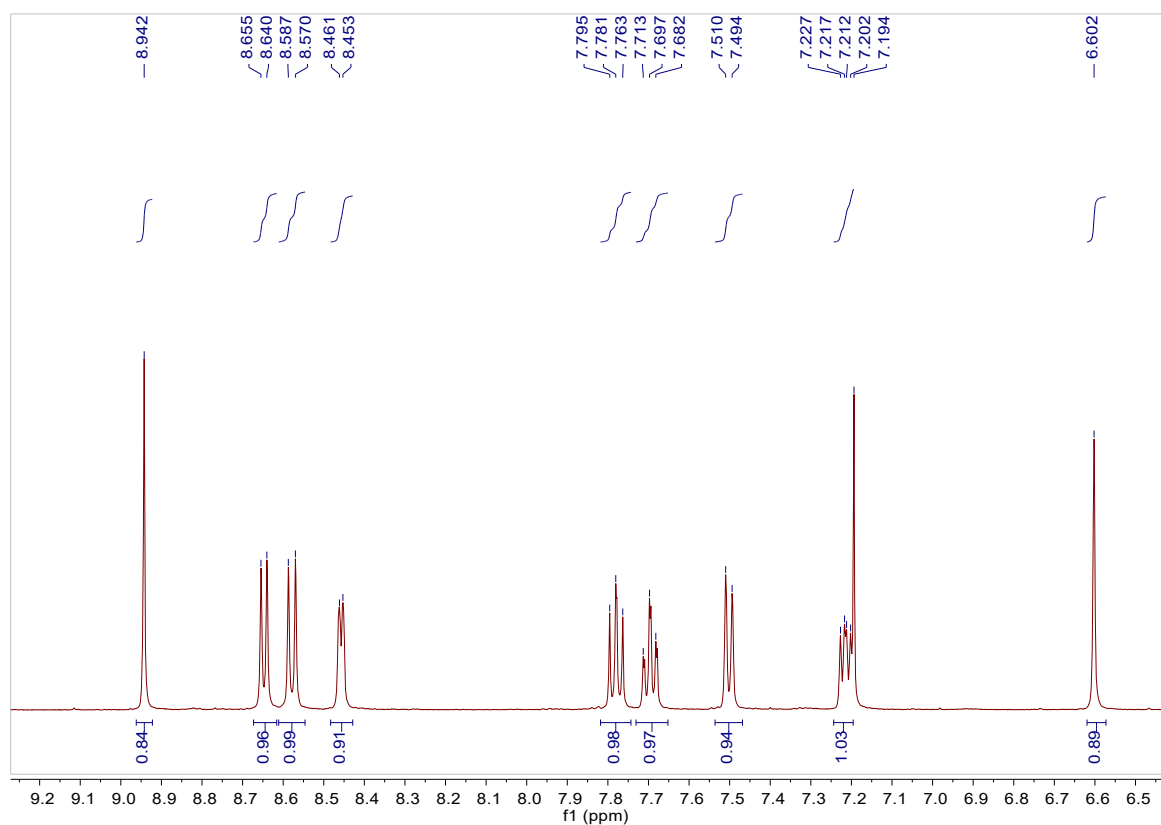

**Figure S5** <sup>1</sup>H NMR (CDCl<sub>3</sub>, 500 MHz) spectra of compound **4b**.

## 6. Comparison of UV-vis spectra of 4b with the final state of 1a with NaClO

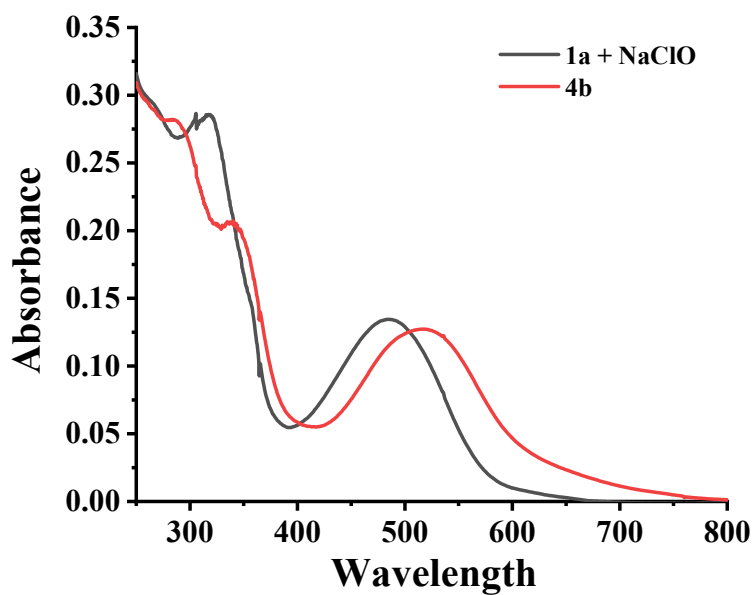

**Figure S6** The UV-vis final state of probe **1a** (20  $\mu$ M) with 25.0 equiv. NaClO and the UV-vis spectra of compound **4b** in  $\text{CH}_3\text{CN}$ .

## 7. Solvent effect of compound 4b

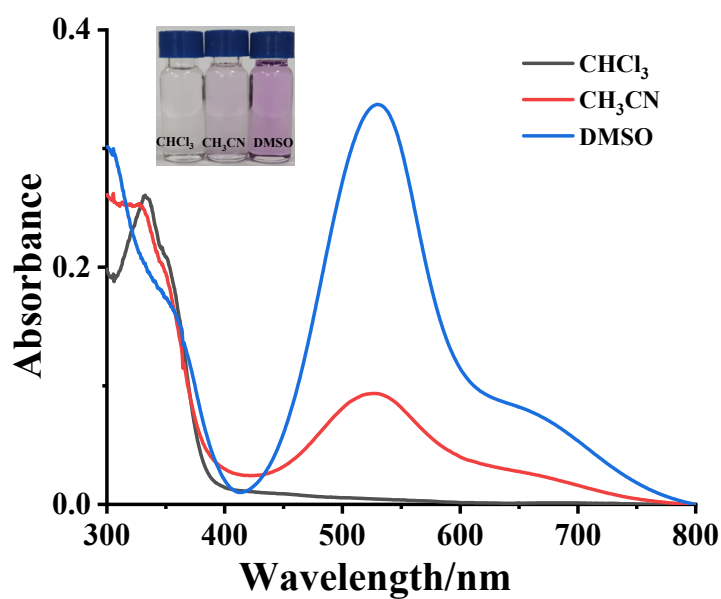

**Figure S7.** Variation of absorption spectrum and color of compound **4b** (20 $\mu$ M) in different solvents.

## 8. The fluorescence titration of compound 4b with $\text{ClO}^-$

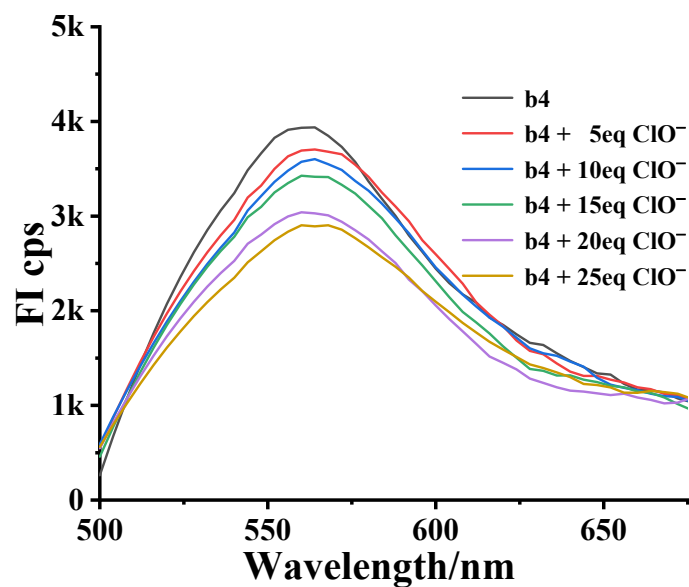

**Figure S8** Fluorescence spectral changes of **4b** (20  $\mu\text{M}$ ) ( $\lambda_{\text{ex}} = 480 \text{ nm}$ ) upon the titration with  $\text{ClO}^-$  (0 to 25.0 equiv.) in PBS buffer (pH 7.4, with 10%  $\text{CH}_3\text{CN}$ , v/v).

### 9. Relative Cell Viability

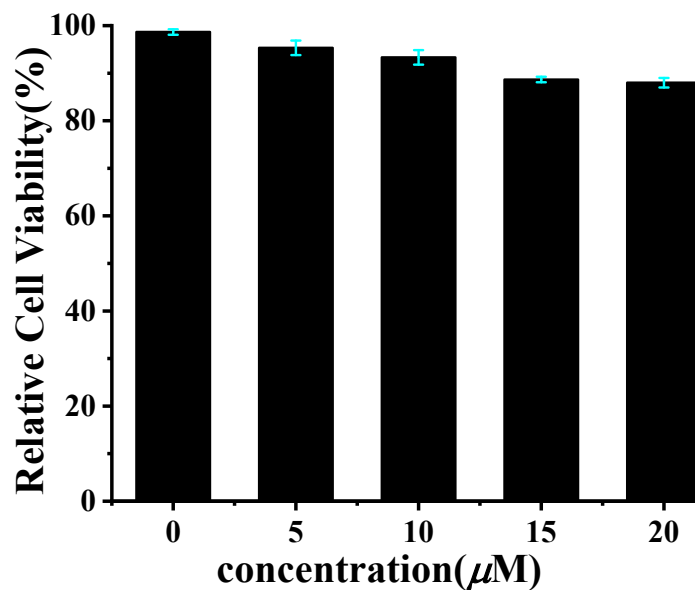

**Figure S9** Effects of the probe **1a** with various concentrations (0-20  $\mu\text{M}$ ) on the viability of the PANC cells in PBS buffer (pH 7.4).

## 10. The application of probe 1a in test paper

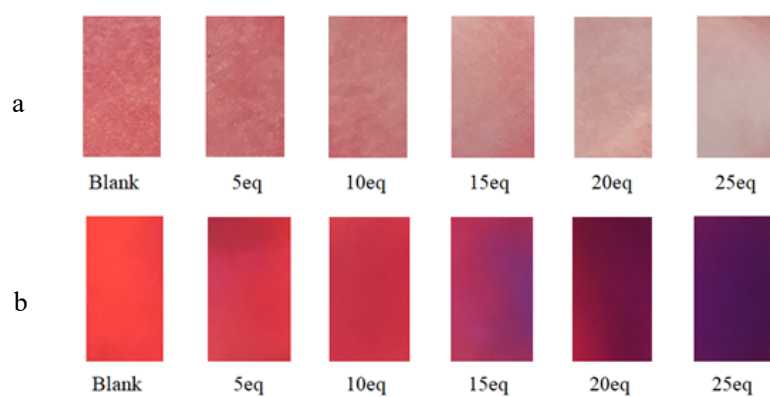

**Figure S10** (a) Bright photos of the test strip loaded with probe **1a** (1.0 mM) were utilized to sense  $\text{ClO}^-$ . (b) The fluorescence color change of adding different concentrations of  $\text{ClO}^-$  to the test strip with probe **1a** (1.0 mM) under 365 nm UV light.

## 11. $^1\text{H}$ NMR spectra of the probe 1a

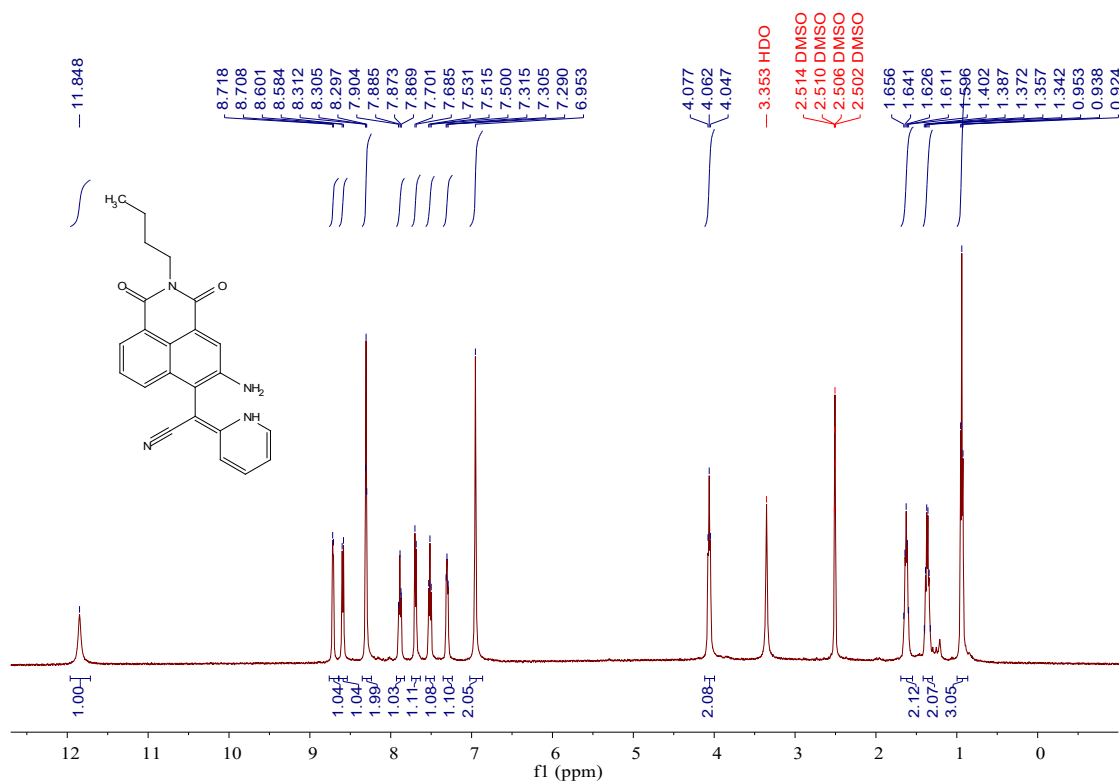

**Figure S11**  $^1\text{H}$  NMR ( $\text{DMSO}-d_6$ , 500 MHz) spectra of compound **1a**.

## 12. Comparison of the this work with reported HClO probes

**Table S1.** Comparison of analytical parameters of representative fluorescent probes for HClO

| Probe structures                                                                    | LOD           | Solvent                                                    | Reaction time | Ref.                                                                            |
|-------------------------------------------------------------------------------------|---------------|------------------------------------------------------------|---------------|---------------------------------------------------------------------------------|
| 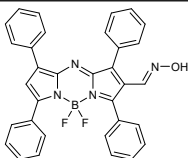   | 2.33 $\mu$ M  | HEPES / CH <sub>3</sub> CN<br>(1 / 1, v/v, 10 mM, pH=7.2)  | -             | <i>Spectrochim. Acta. A Mol. Biomol. Spectrosc.</i> <b>2019</b> , 206, 190-196. |
|    | 4.37 $\mu$ M  | DMSO / PBS<br>(5 / 95, v/v, 10 mM, pH=7.4)                 | 60s           | <i>Dyes and Pigments</i> <b>2020</b> , 174, 108113.                             |
|   | 120 nM        | DMSO / PBS<br>(1 / 99, v/v, 10 mM, pH=7.4)                 | 150s          | <i>Spectrochim. Acta. A Mol. Biomol. Spectrosc.</i> <b>2020</b> , 229, 117992.  |
|  | 94 nM         | PBS buffer (10 mM, pH = 7.4)                               | 60s           | <i>New J. Chem.</i> , <b>2020</b> , 44, 6232-6237.                              |
|  | 0.4 $\mu$ M   | PBS buffer (20 mM, pH = 7.4)                               | 60s           | <i>Sensors Actuators B: Chem.</i> <b>2015</b> , 221 1130-1136.                  |
|  | 0.43 $\mu$ M  | EtOH / PBS(1 / 9, v/v, 10 mM, pH = 7.4)                    | 20s           | <i>Anal. Chim. Acta.</i> <b>2016</b> , 911 114-120                              |
|  | 0.21 $\mu$ M  | PBS buffer (50 mM, pH = 7.4, DMF 0.2%)                     | <180s         | <i>Anal. Chem.</i> <b>2016</b> , 88 6615-6620                                   |
|  | 0.131 $\mu$ M | CH <sub>3</sub> CN / PBS<br>(2 / 8, v/v, 10 mM, pH = 7.4,) | 5 s           | <i>Sensors Actuators B: Chem.</i> <b>2021</b> , 327, 128884                     |



|                                                                                   |              |                                                                           |       |                                                               |
|-----------------------------------------------------------------------------------|--------------|---------------------------------------------------------------------------|-------|---------------------------------------------------------------|
| 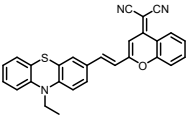 | 0.72 $\mu$ M | EtOH / PBS<br>(1:1, v/v, 10 mM,<br>pH = 7.4).                             | -     | <i>Sensors and Actuators B</i><br><b>2018</b> , 255, 963-969. |
|  | 84 nM        | DMF / PBS (1 / 9,<br>v/v, 10 mM, pH =<br>7.4,)                            | 660 s | <i>Chemical Science</i> . <b>2021</b> , 12,<br>13483-13491.   |
|  | 50 $\mu$ M   | THF / PBS(1 / 1,<br>v/v, 10 mM ,pH =<br>7.4)                              | 15 s  | <i>Chinese Chemical Letters</i><br><b>2018</b> , 29 139-142   |
|  | 37.56 nM     | C <sub>2</sub> H <sub>5</sub> OH / PBS<br>(1 / 1, v/v, 10<br>mM, pH=7.4), | < 30s | <i>RSC Adv.</i> , <b>2022</b> , 12, 777–784                   |
|  | 36.01 nM     | CH <sub>3</sub> CN/PBS (1/9,<br>v/v, 10 mM,<br>pH=7.4)                    | 1.2 s | This work                                                     |
